# Supplementary material for: Stemness marker ALDH1A1 promotes tumor angiogenesis via retinoic acid/HIF-1α/VEGF signalling in MCF-7 breast cancer cells
Source: PubMed Central journal article supplement (PMC6291966; doi:10.1186/s13046-018-0975-0), 2018-12-12

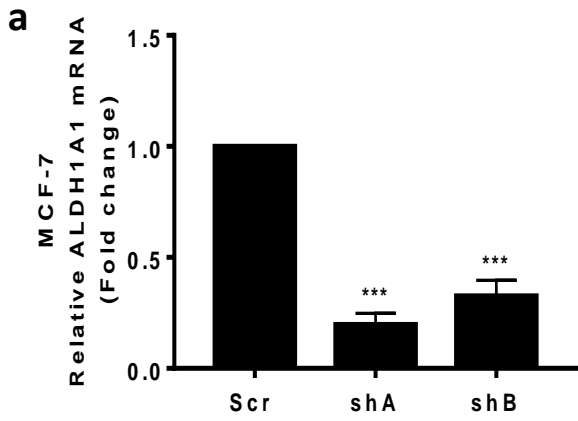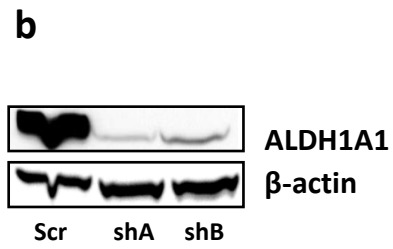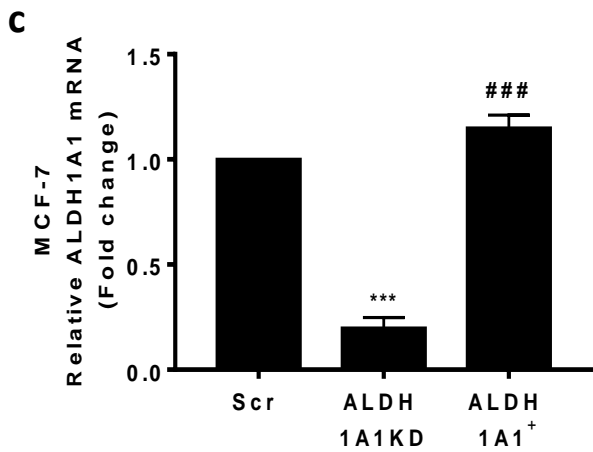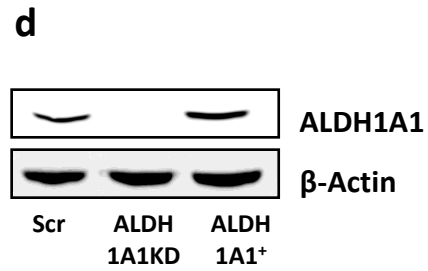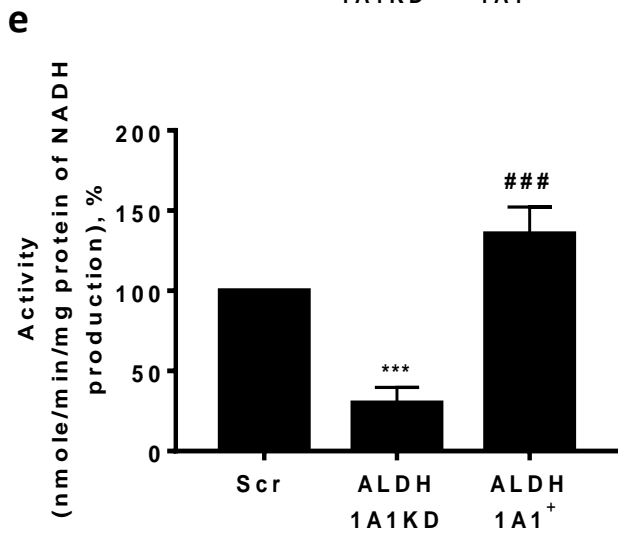

Supplement: 13046_2018_975_MOESM2_ESM.pdf [file 13046_2018_975_MOESM2_ESM.pdf]
