# Supplementary material for: Stemness marker ALDH1A1 promotes tumor angiogenesis via retinoic acid/HIF-1α/VEGF signalling in MCF-7 breast cancer cells
Source: PubMed Central journal article supplement (PMC6291966; doi:10.1186/s13046-018-0975-0), 2018-12-12
Supplement: 13046_2018_975_MOESM4_ESM.pdf [file 13046_2018_975_MOESM4_ESM.pdf]

**Table S2. Angiogenic factors release evaluated by ELISA plate array in supernatants of MCF-7 treated with CM037 (1  $\mu$ M) for 48 h.**

| <b>PROANGIOGENIC</b><br>(Fold change CM037 Vs Ctrl) | <b>ANTIANGIOGENIC</b><br>(Fold change CM037 Vs Ctrl) |
|-----------------------------------------------------|------------------------------------------------------|
| VEGF (-16.77) $\pm$ 2.83                            | IL-12 (+26.12) $\pm$ 3.65                            |
| PIGF (-16.64) $\pm$ 0.96                            | PAI-1 (+16.41) $\pm$ 1.98                            |
| IL-8 (-13.39) $\pm$ 1.88                            |                                                      |
| FGFb (+ 3.31) $\pm$ 0.52                            |                                                      |
