# Supplementary material for: Stemness marker ALDH1A1 promotes tumor angiogenesis via retinoic acid/HIF-1α/VEGF signalling in MCF-7 breast cancer cells
Source: Springer Nature journal article supplement (doi:10.1186/s13046-018-0975-0), 2018-12-01
Supplement: MOESM1 [file 16336950]

**Table S1. List of qPCR primers**

| <b>NAME</b>                     | <b>Forward primer (5'-3')</b> | <b>Reverse primer (5'-3')</b> |
|---------------------------------|-------------------------------|-------------------------------|
| <i>VEGF</i>                     | CAAGACAAGAAAATCCCTGTGG        | CCTCGGCTTGTCACATCTG           |
| <i>HIF-1<math>\alpha</math></i> | CCAGTTACGTTCCCTTCGATCAGT      | TTTGAGTTGCGCTTTCA             |
| <i>CAIX</i>                     | CTTTGAATGGGCGAGTGATT          | CAGGAATTCAGCTGGACTGG          |
| <i>SOX2</i>                     | TTGCTGCCTCTTTAAGACTAGGA       | TAAGCCTGGGGCTCAAACCT          |
| <i>NANOG</i>                    | ACATGCAACCTGAAGACGTGTG        | CATGGAAACCAGAACACGTGG         |
| <i>OCT-4</i>                    | ACATCAAAGCTCTGCAGAAAGAACT     | CTGAATACCTTCCCAAATAGAACCC     |
| <i>TWIST</i>                    | AGCTACGCCTTCTCGGTCT           | CCTTCTCTGGAAACAATGACATC       |
| <i>RPL19</i>                    | GATGCCGGAAAAACACCTTG          | TGGCTGTACCCTTCCGCTT           |
