# Supplementary material for: Stemness marker ALDH1A1 promotes tumor angiogenesis via retinoic acid/HIF-1α/VEGF signalling in MCF-7 breast cancer cells
Source: Springer Nature journal article supplement (doi:10.1186/s13046-018-0975-0), 2018-12-01
Supplement: MOESM5 [file 16336950]

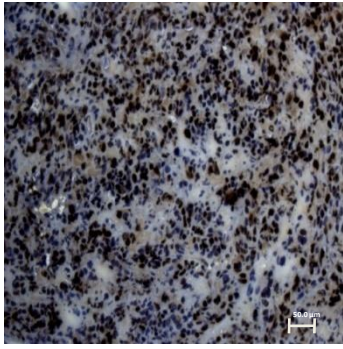

**Scr**

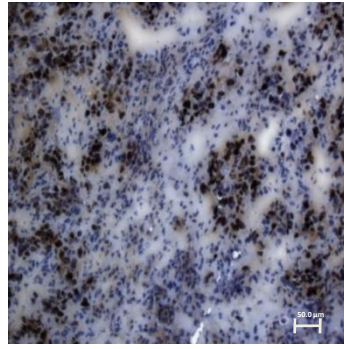

**ALDH1A1KD**

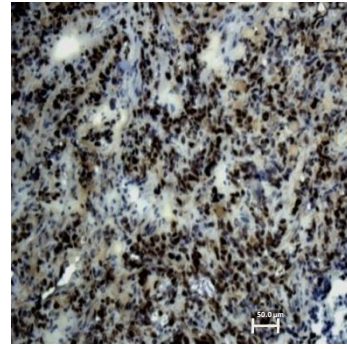

**ALDH1A1<sup>+</sup>**

**Ki67(20x)**
